# Supplementary material for: Non-linear association between interpregnancy interval after vaginal delivery and singleton preterm birth: a retrospective cohort study
Source: Springer Nature journal article supplement (doi:10.1186/s12884-025-07373-x), 2025-03-11
Supplement: MOESM1 [file 12884_2025_7373_MOESM1_ESM.pdf]

## **Supplement Content**

**Supplementary Figure 1.** Directed acyclic graph (DAG) illustrating confounder selection.

**Supplementary Figure 2.** Subgroup analyses between interpregnancy interval and preterm birth by age at the prior birth.

**Supplementary Figure 3.** Subgroup analyses between interpregnancy interval and preterm birth by pre-pregnancy BMI.

**Supplementary Figure 4.** Subgroup analyses between interpregnancy interval and preterm birth by parity before the  
current pregnancy.

**Supplementary Figure 5.** Subgroup analyses between interpregnancy interval and preterm birth by mode of delivery.

**Supplementary Figure 6.** Non-linear association between interpregnancy interval and preterm birth based on  
without potential confounders or missing data.

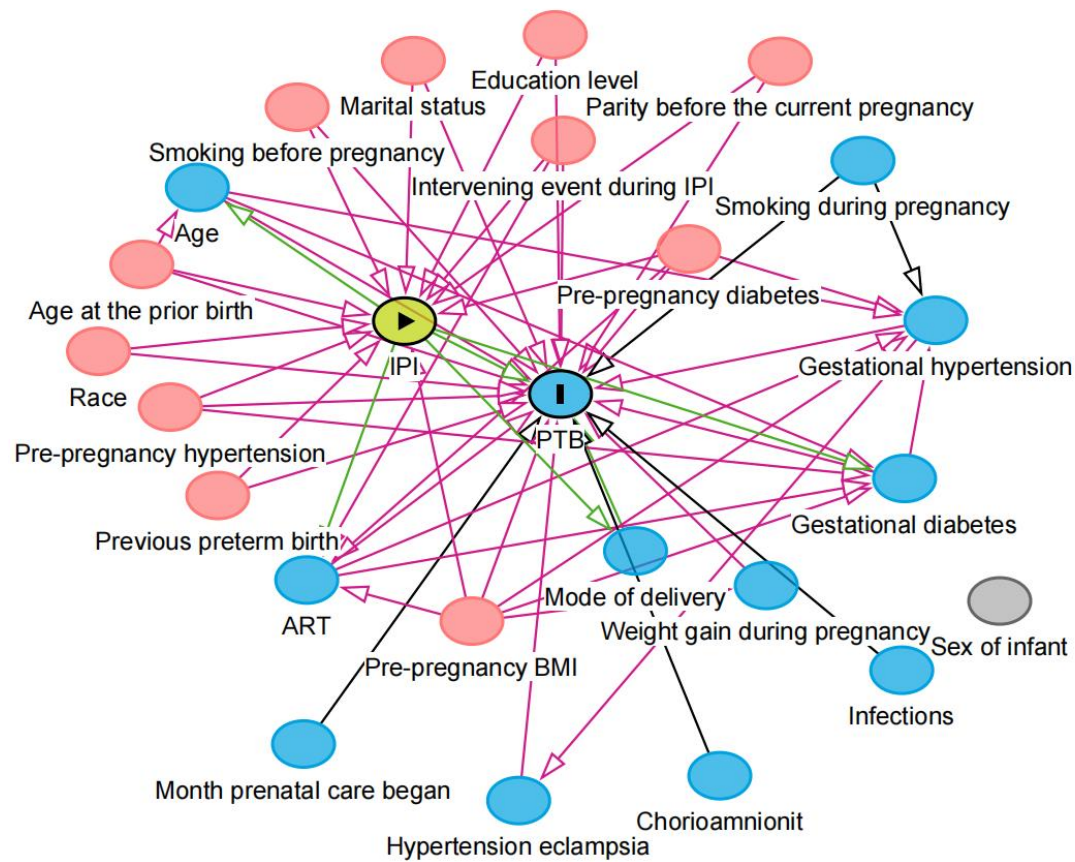

**Supplementary Figure 1.** Directed acyclic graph (DAG) illustrating confounders selection.

**Abbreviations:** IPI, interpregnancy interval; BMI, body mass index; ART, assisted reproductive technology.

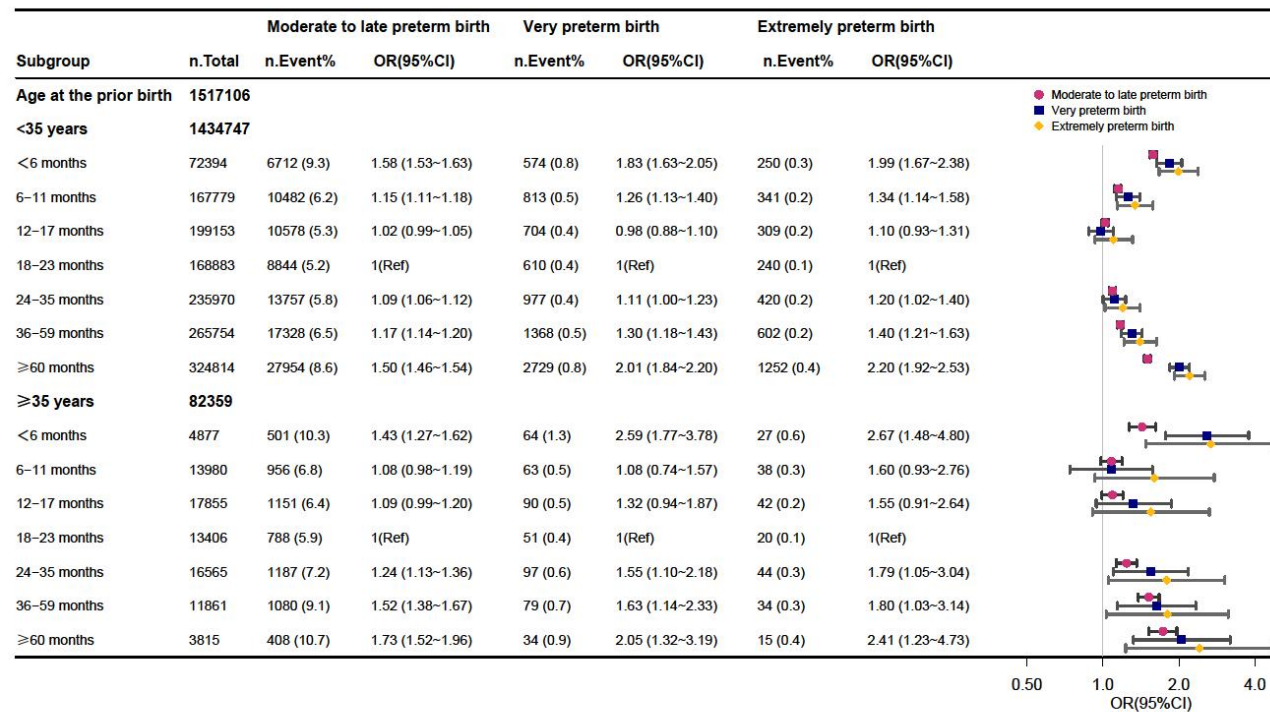

**Supplementary Figure 2.** Subgroup analyses between interpregnancy interval and preterm birth by age at the prior birth.

**Abbreviations:** CI, confidence interval; OR, odds ratio; Ref, reference; BMI, body mass index.

Adjusted for race, marital status, education level, intervening event during IPI, parity before the current pregnancy, pre-pregnancy BMI, smoking before pregnancy, pre-pregnancy diabetes, pre-pregnancy hypertension, and previous history of preterm birth.

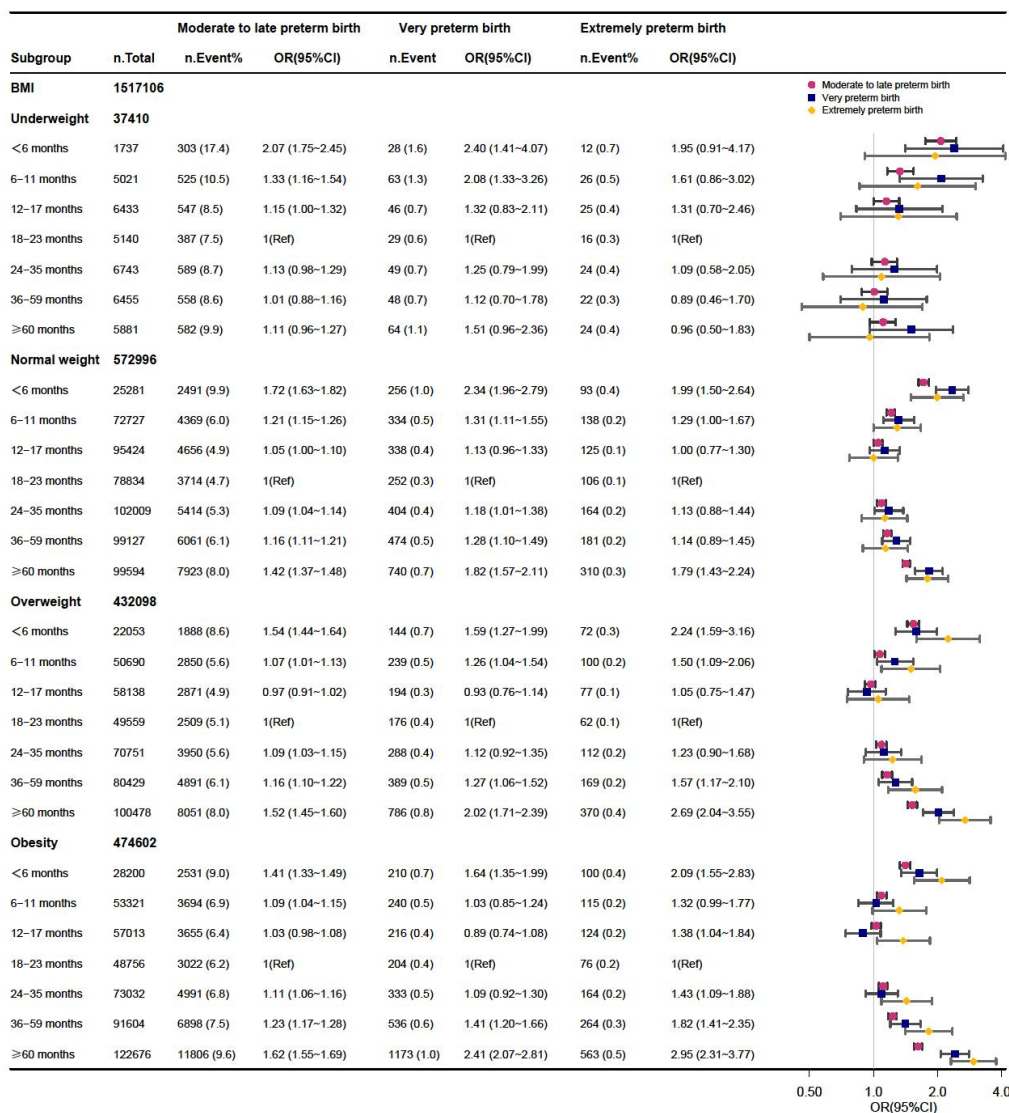

**Supplementary Figure 3.** Subgroup analyses between interpregnancy interval and preterm birth by pre-pregnancy BMI.

**Abbreviations:** CI, confidence interval; OR, odds ratio; Ref, reference; BMI, body mass index.

Adjusted for age at the prior birth, race, marital status, education level, intervening event during IPI, parity before the current pregnancy, smoking before pregnancy, pre-pregnancy diabetes, pre-pregnancy hypertension, and previous history of preterm birth.

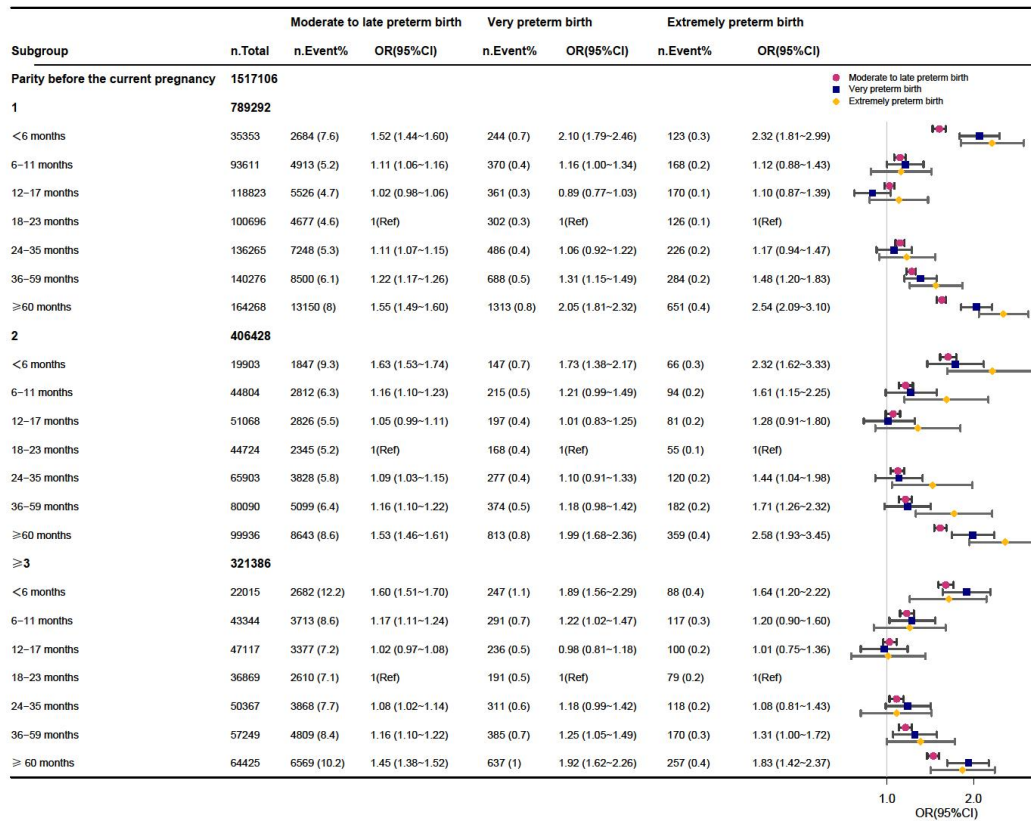

**Supplementary Figure 4.** Subgroup analyses between interpregnancy interval and preterm birth by parity before the current pregnancy.

**Abbreviations:** CI, confidence interval; OR, odds ratio; Ref, reference; BMI, body mass index.

Adjusted for age at the prior birth, race, marital status, education level, intervening event during IPI, pre-pregnancy BMI, smoking before pregnancy, pre-pregnancy diabetes, pre-pregnancy hypertension, and previous history of preterm birth.

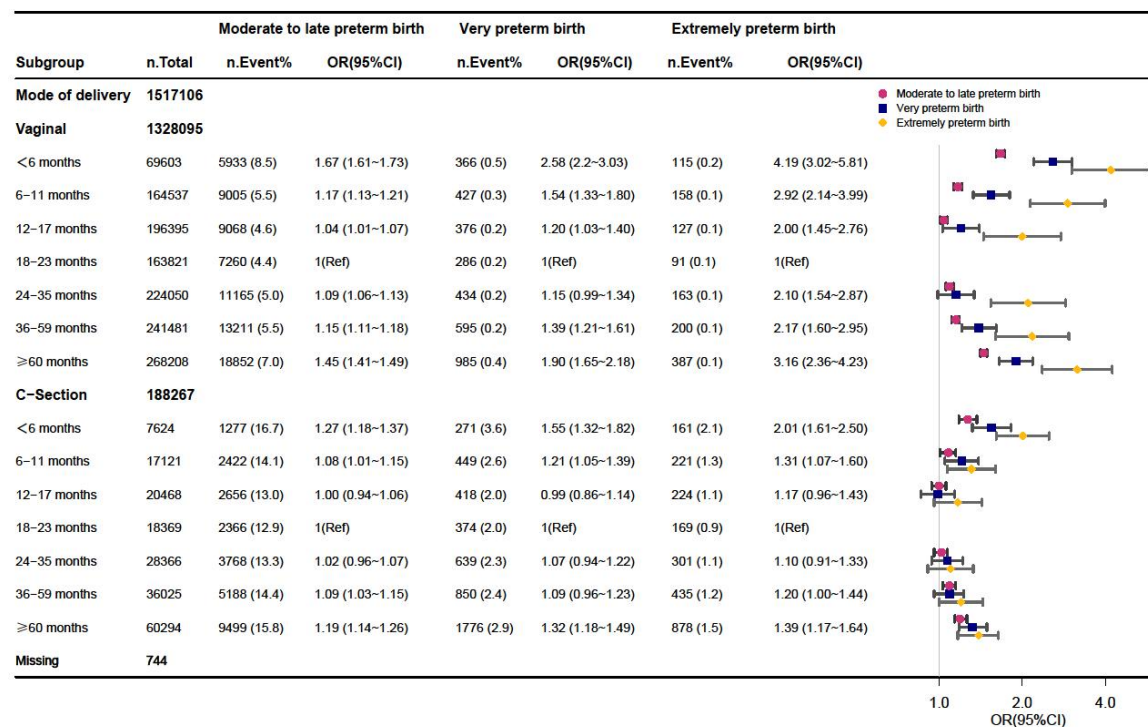

**Supplementary Figure 5.** Subgroup analyses between interpregnancy interval and preterm birth by mode of delivery.

**Abbreviations:** CI, confidence interval; OR, odds ratio; Ref, reference; BMI, body mass index.

Adjusted for age at the prior birth, race, marital status, education level, intervening event during IPI, parity before the current pregnancy, pre-pregnancy BMI, smoking before pregnancy, pre-pregnancy diabetes, pre-pregnancy hypertension, and previous history of preterm birth.



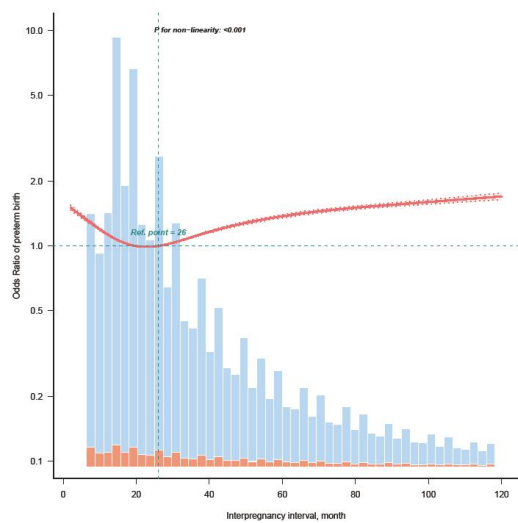

A

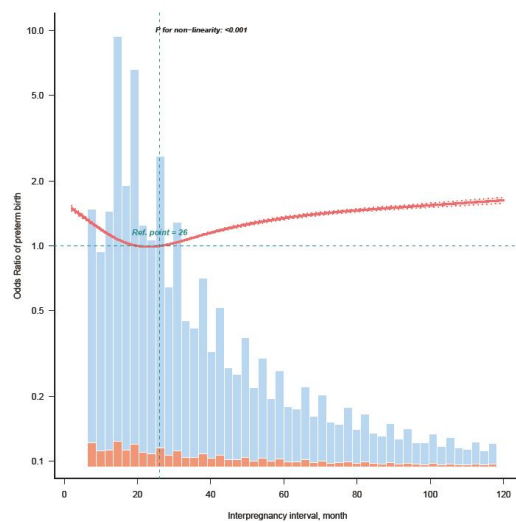

B

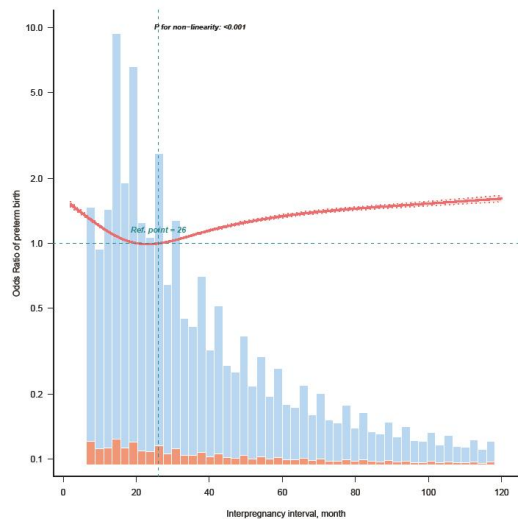

C

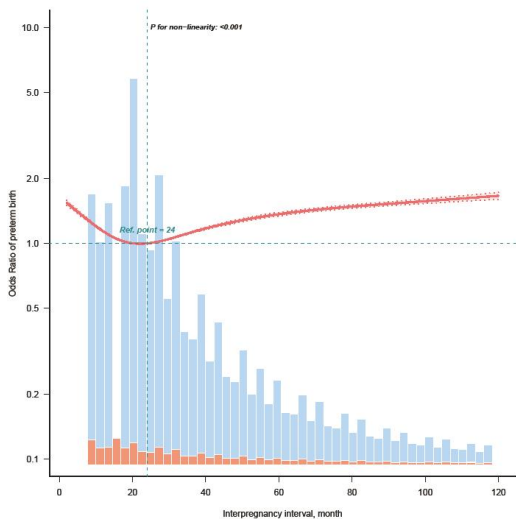

D

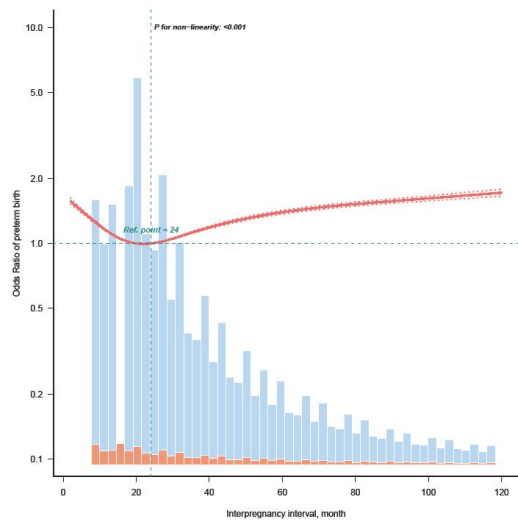

E

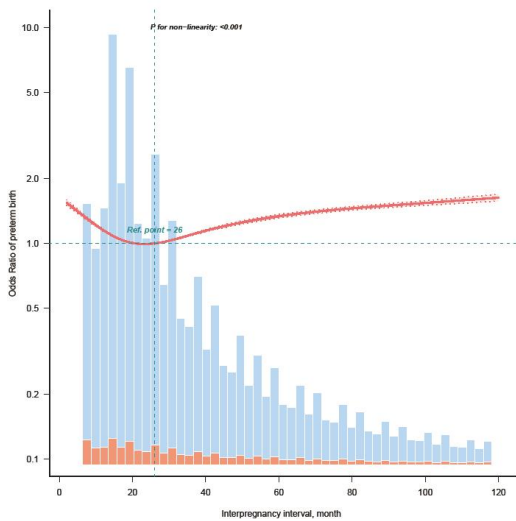

F

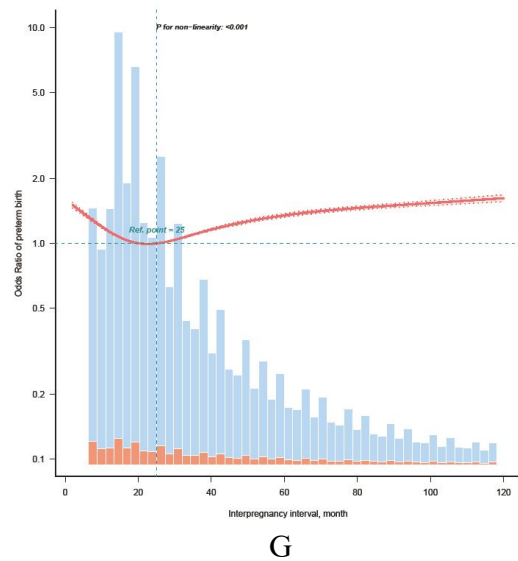

**Supplementary Figure 6.** Non-linear association between interpregnancy interval and preterm birth based on without potential confounders or missing data.

A: Without previous preterm birth (n=1364011)

B: Without pre-pregnancy diabetes (n=1426096)

C: Without pre-pregnancy hypertension (n=1403565)

D: Without intervening event during IPI (n=1262150)

E: Without previous preterm birth, pre-pregnancy diabetes, pre-pregnancy hypertension, and intervening event during IPI (n=1164858)

F: Without SGA or LGA (n=1155456)

G: Without missing covariates (n=1126842)

**Abbreviations:** CI, confidence interval; OR, odds ratio; Ref, reference; IPI, interpregnancy interval; BMI, body mass index; SGA, small for gestational age; LGA, large for gestational age.

Age at the prior birth, race, marital status, education level, intervening event during IPI, parity before the current pregnancy, pre-pregnancy BMI, smoking before pregnancy, pre-pregnancy diabetes, pre-pregnancy hypertension, and previous history of preterm birth were adjusted for in the model except when the variable was excluded.

Solid and dashed lines indicate the predicted value and 95% CI. Only data for the IPI in the range of 1-120 months are shown.
